# Supplementary material for: Angiogenic Factor AGGF1 Activates Autophagy with an Essential Role in Therapeutic Angiogenesis for Heart Disease
Source: PLoS Biol. 2016 Aug 11;14(8):e1002529. doi: 10.1371/journal.pbio.1002529 (PMC4981375; doi:10.1371/journal.pbio.1002529)
Supplement: S1 Table — (XLSX) [file pbio.1002529.s018.xlsx]

## Sheet: S Table1
		Global heart(%)					Infarct region(%)
			longitudinal Strain	longitudinal SR	Radial strain	Radial SR		longitudinal Strain	longitudinal SR	Radial strain	Radial SR
1 day	Sham		-16.14±0.83	-8.54±0.91	36.46±4.37	9.94±1.26		-16.08±2.41	-8.72±0.87	33.10±4.95	9.31±0.79
	MI+IgG		-5.79±0.19	-4.31±0.97	13.59±2.37	4.84±0.90		-3.50±0.64	-3.31±1.07	7.15±1.99	3.58±0.26
	MI+AGGF1		-6.16±1.98	-4.55±0.81	13.71±1.82	4.42±0.57		-3.45±0.56	-2.95±0.69	6.41±1.36	3.45±0.90
14 days	Sham		-15.57±0.74	-8.12±0.94	34.78±2.69	8.80±0.61		-17.02±2.37	-8.32±1.60	32.24±2.75	8.31±0.72
	MI+IgG		-2.51±0.92	-2.14±0.52	8.67±3.62	3.09±0.61		-1.42±0.20	-1.20±0.36	4.06±2.40	1.92±0.33
	MI+AGGF1		-7.32±3.00	-4.36±1.31	15.70±7.34	5.04±1.77		-3.69±1.15	-2.94±1.00	8.75±6.87	3.06±1.49
28 days	Sham		-16.76±1.38	-8.49±0.71	33.02±7.55	9.78±2.01		-17.17±2.16	-8.78±1.22	33.10±5.98	9.36±1.16
	MI+IgG		-2.85±0.86	-2.72±0.74	7.38±2.41	2.69±0.24		-1.61±0.63	-1.22±0.11	3.06±1.71	1.78±0.66
	MI+AGGF1		-8.03±2.38	-5.14±1.56	21.25±11.77	6.62±3.25		-4.39±2.68	-3.52±1.54	15.42±11.18	5.16±3.21
